# Supplementary material for: Silencing of GRHL2 induces epithelial‑to‑mesenchymal transition in lung cancer cell lines with different effects on proliferation and clonogenic growth
Source: PubMed Central journal article supplement — Oncol Lett. 2023 Jul 25;26(3):391. doi: 10.3892/ol.2023.13977 (PMC10433723; doi:10.3892/ol.2023.13977), 2023-07-25

Figure S1. Transfection efficiency evaluated by co-transfecting *EGFP*-expressing vector together with the *GRHL2*-expressing vector. *EGFP*-expressing cells were counted as those successfully transfected with the *GRHL2*-expressing vector. A representative image is shown. GRHL2, Grainyhead-like 2; GFP, green fluorescent protein.

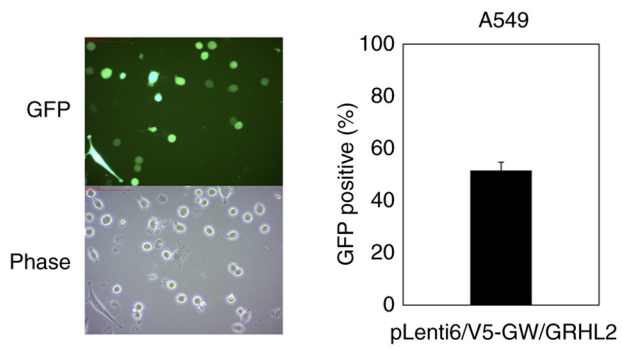

Supplement: Supplementary_Data1.pdf [file Supplementary_Data1.pdf]
