# Supplementary material for: Silencing of GRHL2 induces epithelial‑to‑mesenchymal transition in lung cancer cell lines with different effects on proliferation and clonogenic growth
Source: PubMed Central journal article supplement — Oncol Lett. 2023 Jul 25;26(3):391. doi: 10.3892/ol.2023.13977 (PMC10433723; doi:10.3892/ol.2023.13977), 2023-07-25
Supplement: Supplementary_Data2.pdf [file Supplementary_Data2.pdf]

Table SI. Primer sequences.

| Target                                    | Forward primer (5' to 3') | Reverse primer (5' to 3') |
|-------------------------------------------|---------------------------|---------------------------|
| E-cadherin                                | GGTCTGTCATGGAAGGTGCT      | GATGGCGGCATTGTAGGT        |
| Vimentin                                  | AGTCCACTGAGTACCGGAGAC     | CATTTACGCATCTGGCGTTC      |
| TWIST1                                    | GGCATCACTATGGACTTTCTCTATT | GGCCAGTTTGATCCCAGTATT     |
| Zinc finger<br>E-box-binding<br>homeobox1 | CGAAACGCGAGGTTTGTA        | CTAGACAGGAAATCCCACACAA    |
| SNAI1                                     | AGGATCTCCAGGCTCGAAAG      | TCGGATGTGCATCTTGAGG       |
| SNAI2                                     | CCATGCCTGTCATACCACAA      | ACAGTGATGGGGCTGTATGC      |
| GAPDH                                     | ACTTCAACAGCGACACCC        | TACCAGGAAATGAGCTTGAC      |
| SNAI, Snail homolog.                      |                           |                           |

Table SII. Pearson's correlation coefficient between *GRHL2* and epithelial-to-mesenchymal transition-related genes<sup>a</sup>.

| A, Adenocarcinoma (tumor)  |                        |                       |                        |                        |                        |                        |                        |                        |                       |
|----------------------------|------------------------|-----------------------|------------------------|------------------------|------------------------|------------------------|------------------------|------------------------|-----------------------|
| Gene                       | <i>GRHL2</i>           | <i>E-cadherin</i>     | <i>Vimentin</i>        | <i>ZEB1</i>            | <i>ZEB2</i>            | <i>TWIST1</i>          | <i>TWIST2</i>          | <i>SNAI1</i>           | <i>SNAI2</i>          |
| <i>GRHL2</i>               | 1.00                   | 0.48                  | -0.41                  | -0.39                  | -0.31                  | -0.23                  | -0.32                  | -0.22                  | -0.25                 |
|                            | NA                     | 0.00                  | 0.00                   | 0.00                   | 6.20x10 <sup>-13</sup> | 1.90x10 <sup>-7</sup>  | 2.20x10 <sup>-13</sup> | 2.60x10 <sup>-7</sup>  | 1.40x10 <sup>-8</sup> |
| <i>E-cadherin</i>          | 0.48                   | 1.00                  | -0.07                  | -0.09                  | -0.06                  | -0.16                  | -0.22                  | -0.19                  | -0.22                 |
|                            | 0.00                   | NA                    | 0.09                   | 0.04                   | 0.19                   | 0.00                   | 3.40x10 <sup>-7</sup>  | 9.50x10 <sup>-6</sup>  | 7.10x10 <sup>-7</sup> |
| <i>Vimentin</i>            | -0.41                  | -0.07                 | 1.00                   | 0.59                   | 0.62                   | 0.23                   | 0.32                   | 0.15                   | 0.38                  |
|                            | 0.00                   | 0.09                  | NA                     | 0.00                   | 0.00                   | 7.60x10 <sup>-8</sup>  | 1.50x10 <sup>-13</sup> | 0.00                   | 0.00                  |
| <i>ZEB1</i>                | -0.39                  | -0.09                 | 0.59                   | 1.00                   | 0.73                   | 0.20                   | 0.32                   | 0.14                   | 0.50                  |
|                            | 0.00                   | 0.04                  | 0.00                   | NA                     | 0.00                   | 6.50x10 <sup>-6</sup>  | 9.00x10 <sup>-14</sup> | 0.00                   | 0.00                  |
| <i>ZEB2</i>                | -0.31                  | -0.06                 | 0.62                   | 0.73                   | 1.00                   | 0.08                   | 0.28                   | 0.16                   | 0.39                  |
|                            | 6.20x10 <sup>-13</sup> | 0.19                  | 0.00                   | 0.00                   | NA                     | 0.06                   | 4.70x10 <sup>-11</sup> | 0.00                   | 0.00                  |
| <i>TWIST1</i>              | -0.23                  | -0.16                 | 0.23                   | 0.20                   | 0.08                   | 1.00                   | 0.35                   | 0.49                   | 0.60                  |
|                            | 1.90x10 <sup>-7</sup>  | 0.00                  | 7.60x10 <sup>-8</sup>  | 6.50x10 <sup>-6</sup>  | 0.06                   | NA                     | 4.40x10 <sup>-16</sup> | 0.00                   | 0.00                  |
| <i>TWIST2</i>              | -0.32                  | -0.22                 | 0.32                   | 0.32                   | 0.28                   | 0.35                   | 1.00                   | 0.32                   | 0.47                  |
|                            | 2.20x10 <sup>-13</sup> | 3.40x10 <sup>-7</sup> | 1.50x10 <sup>-13</sup> | 9.00x10 <sup>-14</sup> | 4.70x10 <sup>-11</sup> | 4.40x10 <sup>-16</sup> | NA                     | 6.90x10 <sup>-14</sup> | 0.00                  |
| <i>SNAI1</i>               | -0.22                  | -0.19                 | 0.15                   | 0.14                   | 0.16                   | 0.49                   | 0.32                   | 1.00                   | 0.40                  |
|                            | 2.60x10 <sup>-7</sup>  | 9.50x10 <sup>-6</sup> | 0.00                   | 0.00                   | 0.00                   | 0.00                   | 6.90x10 <sup>-14</sup> | NA                     | 0.00                  |
| <i>SNAI2</i>               | -0.25                  | -0.22                 | 0.38                   | 0.50                   | 0.39                   | 0.60                   | 0.47                   | 0.40                   | 1.00                  |
|                            | 1.40x10 <sup>-8</sup>  | 7.10x10 <sup>-7</sup> | 0.00                   | 0.00                   | 0.00                   | 0.00                   | 0.00                   | 0.00                   | NA                    |
| B, Adenocarcinoma (normal) |                        |                       |                        |                        |                        |                        |                        |                        |                       |
| Gene                       | <i>GRHL2</i>           | <i>E-cadherin</i>     | <i>Vimentin</i>        | <i>ZEB1</i>            | <i>ZEB2</i>            | <i>TWIST1</i>          | <i>TWIST2</i>          | <i>SNAI1</i>           | <i>SNAI2</i>          |

|                   |                        |                        |       |                       |                       |       |       |       |       |
|-------------------|------------------------|------------------------|-------|-----------------------|-----------------------|-------|-------|-------|-------|
| <i>GRHL2</i>      | 1.00                   | 0.70                   | -0.21 | -0.05                 | -0.09                 | -0.19 | -0.35 | -0.22 | -0.34 |
|                   | NA                     | 7.50x10 <sup>-10</sup> | 0.11  | 0.69                  | 0.50                  | 0.16  | 0.01  | 0.10  | 0.01  |
| <i>E-cadherin</i> | 0.70                   | 1.00                   | -0.08 | -0.11                 | -0.24                 | 0.02  | -0.25 | -0.16 | -0.22 |
|                   | 7.50x10 <sup>-10</sup> | NA                     | 0.53  | 0.41                  | 0.07                  | 0.89  | 0.06  | 0.24  | 0.09  |
| <i>Vimentin</i>   | -0.21                  | -0.08                  | 1.00  | -0.11                 | 0.36                  | 0.13  | 0.00  | 0.01  | 0.15  |
|                   | 0.11                   | 0.53                   | NA    | 0.39                  | 0.01                  | 0.35  | 1.00  | 0.94  | 0.25  |
| <i>ZEB1</i>       | -0.05                  | -0.11                  | -0.11 | 1.00                  | 0.52                  | -0.08 | -0.18 | 0.33  | 0.32  |
|                   | 0.69                   | 0.41                   | 0.39  | NA                    | 3.00x10 <sup>-5</sup> | 0.53  | 0.18  | 0.01  | 0.01  |
| <i>ZEB2</i>       | -0.09                  | -0.24                  | 0.36  | 0.52                  | 1.00                  | 0.08  | -0.16 | 0.23  | 0.19  |
|                   | 0.50                   | 0.07                   | 0.01  | 3.00x10 <sup>-5</sup> | NA                    | 0.52  | 0.22  | 0.08  | 0.14  |
| <i>TWIST1</i>     | -0.19                  | 0.02                   | 0.13  | -0.08                 | 0.08                  | 1.00  | 0.38  | 0.09  | 0.27  |
|                   | 0.16                   | 0.89                   | 0.35  | 0.53                  | 0.52                  | NA    | 0.00  | 0.50  | 0.04  |
| <i>TWIST2</i>     | -0.35                  | -0.25                  | 0.00  | -0.18                 | -0.16                 | 0.38  | 1.00  | 0.13  | 0.36  |
|                   | 0.01                   | 0.06                   | 1.00  | 0.18                  | 0.22                  | 0.00  | NA    | 0.33  | 0.01  |
| <i>SNAI1</i>      | -0.22                  | -0.16                  | 0.01  | 0.33                  | 0.23                  | 0.09  | 0.13  | 1.00  | 0.21  |
|                   | 0.10                   | 0.24                   | 0.94  | 0.01                  | 0.079                 | 0.50  | 0.33  | NA    | 0.11  |
| <i>SNAI2</i>      | -0.34                  | -0.22                  | 0.15  | 0.32                  | 0.19                  | 0.27  | 0.36  | 0.21  | 1.00  |
|                   | 0.01                   | 0.09                   | 0.25  | 0.01                  | 0.14                  | 0.04  | 0.01  | 0.11  | NA    |

C, Squamous cell carcinoma (tumor)

| Gene              | <i>GRHL2</i>           | <i>E-cadherin</i>      | <i>Vimentin</i>       | <i>ZEB1</i>            | <i>ZEB2</i>            | <i>TWIST1</i> | <i>TWIST2</i>          | <i>SNAI1</i>          | <i>SNAI2</i>          |
|-------------------|------------------------|------------------------|-----------------------|------------------------|------------------------|---------------|------------------------|-----------------------|-----------------------|
| <i>GRHL2</i>      | 1.00                   | 0.32                   | -0.41                 | -0.32                  | -0.35                  | -0.15         | -0.30                  | -0.42                 | 0.22                  |
|                   | NA                     | 2.40x10 <sup>-13</sup> | 0.00                  | 5.10x10 <sup>-13</sup> | 4.40x10 <sup>-16</sup> | 0.00          | 3.40x10 <sup>-12</sup> | 0.00                  | 4.30x10 <sup>-7</sup> |
| <i>E-cadherin</i> | 0.32                   | 1.00                   | -0.18                 | -0.10                  | -0.15                  | -0.15         | -0.23                  | -0.24                 | -0.02                 |
|                   | 2.40x10 <sup>-13</sup> | NA                     | 4.00x10 <sup>-5</sup> | 0.02                   | 0.00                   | 0.00          | 2.70x10 <sup>-7</sup>  | 7.40x10 <sup>-8</sup> | 0.71                  |

|                 |                        |                       |                        |                        |                       |                        |                        |                        |                       |
|-----------------|------------------------|-----------------------|------------------------|------------------------|-----------------------|------------------------|------------------------|------------------------|-----------------------|
| <i>Vimentin</i> | -0.41                  | -0.18                 | 1.00                   | 0.60                   | 0.79                  | 0.31                   | 0.26                   | 0.49                   | -0.06                 |
|                 | 0.00                   | 4.00x10 <sup>-5</sup> | NA                     | 0.00                   | 0.00                  | 2.00x10 <sup>-12</sup> | 2.40x10 <sup>-9</sup>  | 0.00                   | 0.17                  |
| <i>ZEB1</i>     | -0.32                  | -0.1                  | 0.60                   | 1.00                   | 0.72                  | 0.22                   | 0.26                   | 0.31                   | 0.14                  |
|                 | 5.10x10 <sup>-13</sup> | 0.02                  | 0.00                   | NA                     | 0.00                  | 1.00x10 <sup>-6</sup>  | 2.50x10 <sup>-9</sup>  | 2.90x10 <sup>-12</sup> | 0.00                  |
| <i>ZEB2</i>     | -0.35                  | -0.15                 | 0.79                   | 0.72                   | 1.00                  | 0.16                   | 0.18                   | 0.48                   | -0.02                 |
|                 | 4.40x10 <sup>-16</sup> | 0.00                  | 0.00                   | 0.00                   | NA                    | 0.00                   | 6.50x10 <sup>-5</sup>  | 0.00                   | 0.59                  |
| <i>TWIST1</i>   | -0.15                  | -0.15                 | 0.31                   | 0.22                   | 0.16                  | 1.00                   | 0.47                   | 0.23                   | 0.36                  |
|                 | 0.00                   | 0.00                  | 2.00x10 <sup>-12</sup> | 1.00x10 <sup>-6</sup>  | 0.00                  | NA                     | 0.00                   | 1.90x10 <sup>-7</sup>  | 0.00                  |
| <i>TWIST2</i>   | -0.30                  | -0.23                 | 0.26                   | 0.26                   | 0.18                  | 0.47                   | 1.00                   | 0.32                   | 0.24                  |
|                 | 3.40x10 <sup>-12</sup> | 2.70x10 <sup>-7</sup> | 2.40x10 <sup>-9</sup>  | 2.50x10 <sup>-9</sup>  | 6.50x10 <sup>-5</sup> | 0.00                   | NA                     | 4.70x10 <sup>-13</sup> | 3.70x10 <sup>-8</sup> |
| <i>SNAI1</i>    | -0.42                  | -0.24                 | 0.49                   | 0.31                   | 0.48                  | 0.23                   | 0.32                   | 1.00                   | -0.19                 |
|                 | 0.00                   | 7.40x10 <sup>-8</sup> | 0.00                   | 2.90x10 <sup>-12</sup> | 0.00                  | 1.90x10 <sup>-7</sup>  | 4.70x10 <sup>-13</sup> | NA                     | 2.30x10 <sup>-5</sup> |
| <i>SNAI2</i>    | 0.22                   | -0.02                 | -0.06                  | 0.14                   | -0.02                 | 0.36                   | 0.24                   | -0.19                  | 1.00                  |
|                 | 4.30x10 <sup>-7</sup>  | 0.71                  | 0.17                   | 0.00                   | 0.59                  | 0.00                   | 3.70x10 <sup>-8</sup>  | 2.30x10 <sup>-5</sup>  | NA                    |

D, Squamous cell carcinoma (normal)

| Gene              | <i>GRHL2</i> | <i>E-cadherin</i> | <i>Vimentin</i> | <i>ZEB1</i> | <i>ZEB2</i>           | <i>TWIST1</i>         | <i>TWIST2</i> | <i>SNAI1</i> | <i>SNAI2</i> |
|-------------------|--------------|-------------------|-----------------|-------------|-----------------------|-----------------------|---------------|--------------|--------------|
| <i>GRHL2</i>      | 1.00         | 0.44              | -0.14           | -0.14       | -0.09                 | -0.33                 | -0.11         | -0.31        | -0.42        |
|                   | NA           | 0.00              | 0.34            | 0.34        | 0.52                  | 0.02                  | 0.45          | 0.03         | 0.00         |
| <i>E-cadherin</i> | 0.44         | 1.00              | -0.07           | -0.39       | -0.43                 | -0.57                 | 0.08          | -0.14        | -0.31        |
|                   | 0.00         | NA                | 0.65            | 0.00        | 0.00                  | 1.00x10 <sup>-5</sup> | 0.59          | 0.33         | 0.03         |
| <i>Vimentin</i>   | -0.14        | -0.07             | 1.00            | 0.32        | 0.46                  | 0.32                  | -0.24         | -0.05        | 0.35         |
|                   | 0.34         | 0.65              | NA              | 0.02        | 0.00                  | 0.02                  | 0.09          | 0.72         | 0.01         |
| <i>ZEB1</i>       | -0.14        | -0.39             | 0.32            | 1.00        | 0.71                  | 0.12                  | -0.38         | 0.10         | 0.21         |
|                   | 0.34         | 0.00              | 0.02            | NA          | 5.30x10 <sup>-9</sup> | 0.41                  | 0.01          | 0.47         | 0.14         |

|               |       |                       |       |                       |       |                       |       |      |                       |
|---------------|-------|-----------------------|-------|-----------------------|-------|-----------------------|-------|------|-----------------------|
| <i>ZEB2</i>   | -0.09 | -0.43                 | 0.46  | 0.71                  | 1.00  | 0.39                  | -0.24 | 0.10 | 0.44                  |
|               | 0.52  | 0.00                  | 0.00  | $5.30 \times 10^{-9}$ | NA    | 0.00                  | 0.09  | 0.49 | 0.00                  |
| <i>TWIST1</i> | -0.33 | -0.57                 | 0.32  | 0.12                  | 0.39  | 1.00                  | 0.17  | 0.30 | 0.60                  |
|               | 0.02  | $1.00 \times 10^{-5}$ | 0.02  | 0.41                  | 0.00  | NA                    | 0.24  | 0.03 | $3.80 \times 10^{-6}$ |
| <i>TWIST2</i> | -0.11 | 0.08                  | -0.24 | -0.38                 | -0.24 | 0.17                  | 1.00  | 0.28 | -0.02                 |
|               | 0.45  | 0.59                  | 0.09  | 0.01                  | 0.09  | 0.24                  | NA    | 0.05 | 0.87                  |
| <i>SNAI1</i>  | -0.31 | -0.14                 | -0.05 | 0.10                  | 0.10  | 0.30                  | 0.28  | 1.00 | 0.33                  |
|               | 0.03  | 0.33                  | 0.72  | 0.47                  | 0.49  | 0.03                  | 0.05  | NA   | 0.02                  |
| <i>SNAI2</i>  | -0.42 | -0.31                 | 0.35  | 0.21                  | 0.44  | 0.60                  | -0.02 | 0.33 | 1.00                  |
|               | 0.00  | 0.03                  | 0.01  | 0.14                  | 0.00  | $3.80 \times 10^{-6}$ | 0.87  | 0.02 | NA                    |

<sup>a</sup>Upper row, correlation coefficient; lower row, P-value. ZEB, Zinc finger E-box-binding homeobox; n.s., not significant; SNAI, snail homolog.

Table SIII. Cell lines used for DNA copy number analysis.

| A, Adenocarcinoma                                     |         |         |          |
|-------------------------------------------------------|---------|---------|----------|
| HCC2279                                               | H3122   | HCC515  | HCC1195  |
| H820                                                  | HCC1192 | HCC1171 | HCC1897  |
| H969                                                  | HCC4054 | HCC1210 | HCC2302  |
| H1993                                                 | A549    | HCC1637 | HCC4006  |
| H2135                                                 | H1355   | HCC1705 | HCC4047  |
| HCC4058                                               | H1373   | HCC1974 | HCC4225  |
| H1573                                                 | H1395   | HCC2935 | TC255C2  |
| H1581                                                 | H1435   | HCC4011 | H1498    |
| H2347                                                 | H1437   | HCC4019 |          |
| HCC122                                                | H1651   | HCC4087 |          |
| HCC149                                                | H1693   | HCC4150 |          |
| HCC4059                                               | H1734   | Calu-3  |          |
| H358                                                  | H1838   | H1915   |          |
| H441                                                  | H2023   | H2286   |          |
| H1404                                                 | H2087   | H2342   |          |
| H1869                                                 | H2170   | H2887   |          |
| H2073                                                 | H2250   | H3255   |          |
| H2228                                                 | H2258   | HCC78   |          |
| H2444                                                 | H2291   | HCC366  |          |
| H2882                                                 | HCC446  | HCC827  |          |
| B, Squamous cell carcinoma                            |         |         |          |
| HCC3350                                               | HCC2344 | H2122   | HCC1820  |
| HCC1313                                               | HCC3173 | HCC95   | HCC1944  |
| HCC1908                                               | CAL-12T | HCC1719 | HCC2814  |
| HCC2352                                               | H596    | HCC3498 | HCC3444  |
| HCC1588                                               | H2085   | H292    | TC319C   |
| C, Non-small cell lung cancer-not otherwise specified |         |         |          |
| HOP-92                                                | H1568   | A427    | HCC4017  |
| H1563                                                 | H1623   | Calu-1  | LOU-NH91 |
| H2126                                                 | H1648   | DFCI024 | H23      |
| HCC3195                                               | H1650   | H460    |          |

|         |         |         |
|---------|---------|---------|
| SK-LU-1 | H1819   | H522    |
| EBC-1   | H1703   | H661    |
| EKVX    | H1781   | H838    |
| H125    | H1975   | H920    |
| H650    | H2030   | H1666   |
| H1299   | H2172   | H1793   |
| H1792   | HCC193  | H2086   |
| H1944   | HCC1359 | H2110   |
| HOP-62  | HCC1501 | H2405   |
| PC-9    | HCC2450 | HCC15   |
| Calu-6  | HCC3051 | HCC364  |
| DFCI032 | HCC4021 | HCC461  |
| H157    | HCC4032 | HCC1438 |
| H322    | HCC4190 | HCC2108 |
| H324    | HCC4256 | HCC2270 |
| H647    | TC464C  | HCC2885 |

---
